# Supplementary material for: Theoretical insights into spacer molecule design to tune stability, dielectric, and exciton properties in 2D perovskites
Source: Royal Society of Chemistry journal article supplement (doi:10.1039/d4nr04406a), 2025-01-01
Supplement: d4nr04406a1.pdf [file d4nr04406a1.pdf]

**Theoretical Insights into Spacer Molecule Design to Tune  
Stability, Dielectric, and Exciton Properties in 2D  
Perovskites**

Xing Liu, Hejin Yan, Zheng Shu, Xiangyue Cui, Yongqing Cai\*

Joint Key Laboratory of the Ministry of Education, Institute of Applied Physics and  
Materials Engineering, University of Macau, Macau SAR 999078, China;

\*Corresponding author. Email: [yongqingcai@um.edu.mo](mailto:yongqingcai@um.edu.mo)

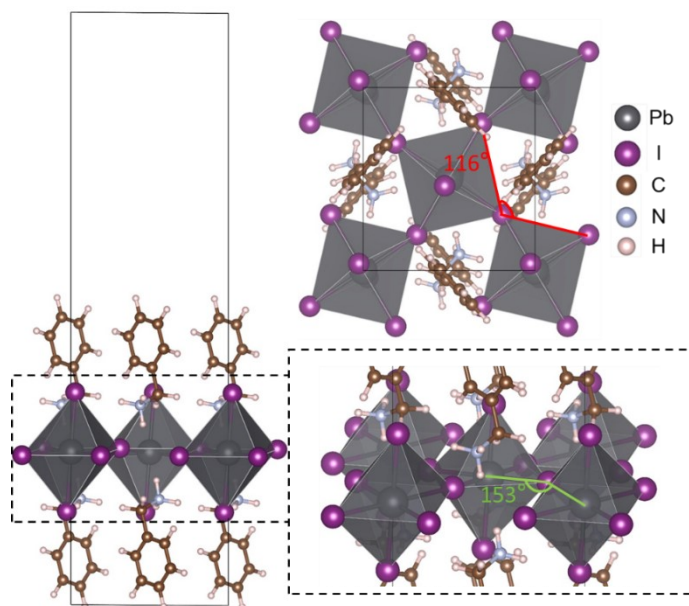

**Figure S1.** Relaxed crystal structure of monolayer (PMA)PbI<sub>4</sub> perovskite. Pb-I-Pb bond angle and I-I-I bond angle are highlighted in the enlarged figure and the figure viewed along c axis.

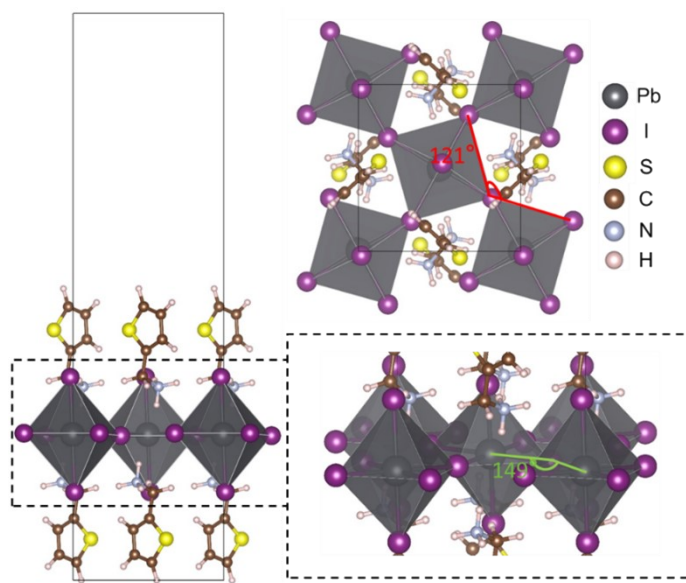

**Figure S2.** Relaxed crystal structure of monolayer (THMA)PbI<sub>4</sub> perovskite. Pb-I-Pb bond angle and I-I-I bond angle are highlighted in the enlarged figure and the figure viewed along c axis.

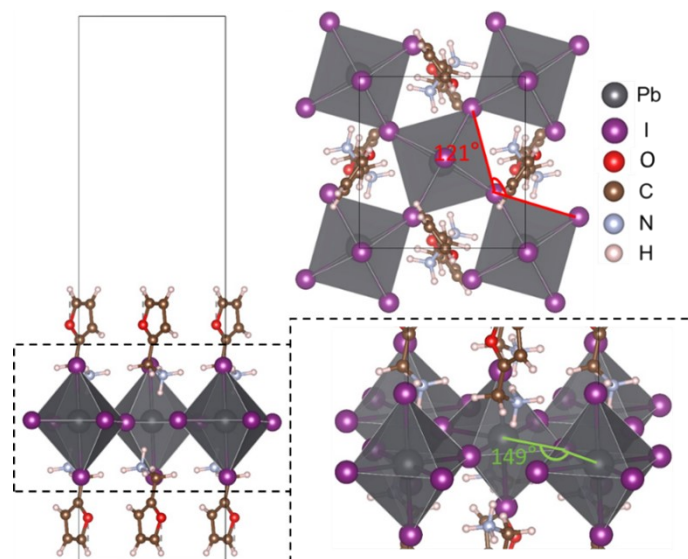

**Figure S3.** Relaxed crystal structure of monolayer (FUMA)PbI<sub>4</sub> perovskite. Pb-I-Pb bond angle and I-I-I bond angle are highlighted in the enlarged figure and the figure viewed along c axis.

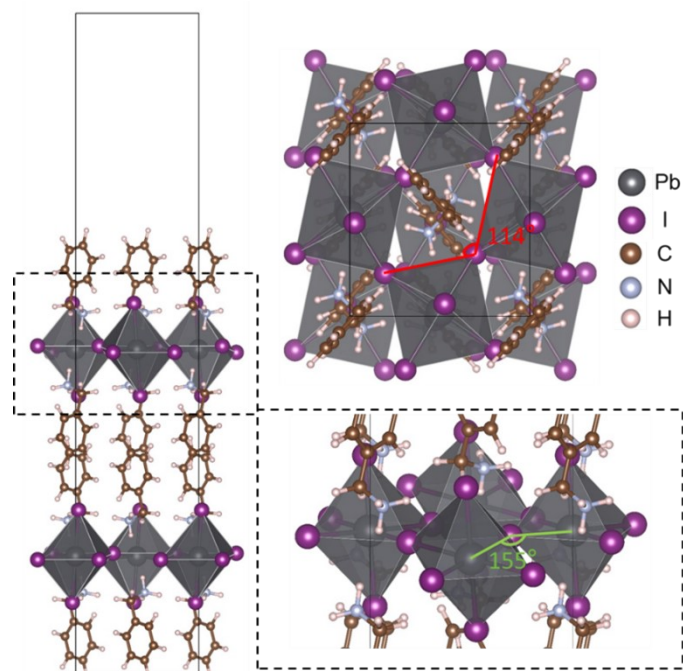

**Figure S4.** Relaxed crystal structure of bilayer (PMA)PbI<sub>4</sub> perovskite. Pb-I-Pb bond angle and I-I-I bond angle are highlighted in the enlarged figure and the figure viewed along c axis.

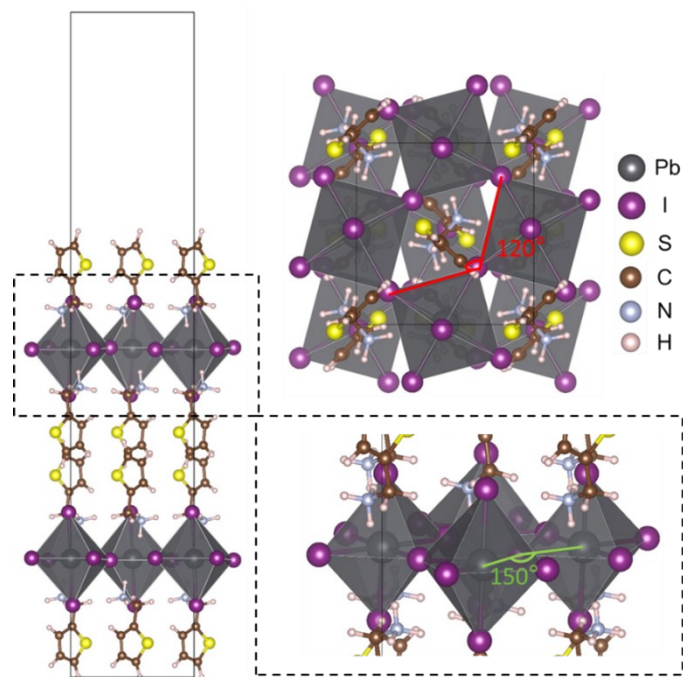

**Figure S5.** Relaxed crystal structure of bilayer (THMA)PbI<sub>4</sub> perovskite. Pb-I-Pb bond angle and I-I-I bond angle are highlighted in the enlarged figure and the figure viewed along c axis.

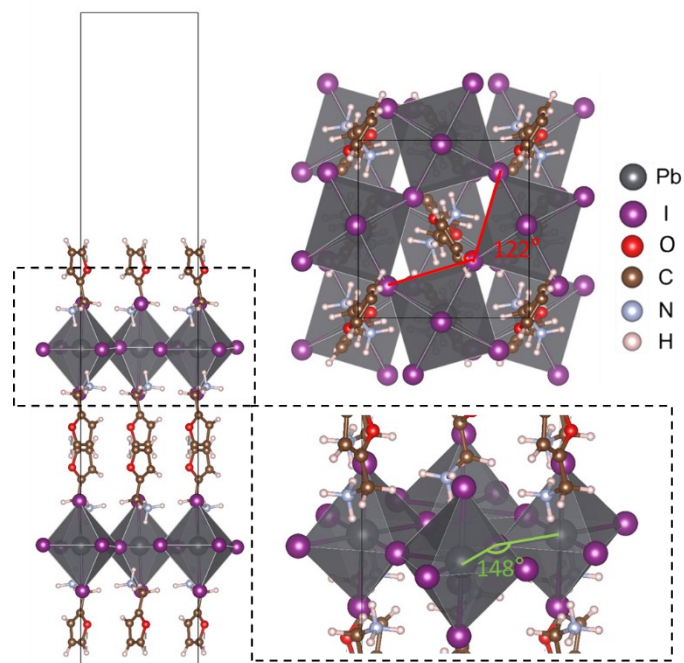

**Figure S6.** Relaxed crystal structure of bilayer (FUMA)PbI<sub>4</sub> perovskite. Pb-I-Pb bond angle and I-I-I bond angle are highlighted in the enlarged figure and the figure viewed along c axis.

**Table S1** Relaxed lattice constants of 2D RP phase of Pb-I perovskites ( $n=1$ ) with different spacer molecules of PMA, THMA and FUMA.

|           |                                      | $a(\text{\AA})$            | $b(\text{\AA})$            | $\alpha(^{\circ})$ | $\beta(^{\circ})$ | $\gamma(^{\circ})$ |
|-----------|--------------------------------------|----------------------------|----------------------------|--------------------|-------------------|--------------------|
| Monolayer | (PMA) <sub>2</sub> PbI <sub>4</sub>  | 8.49,<br>8.67 <sup>a</sup> | 9.05,<br>9.14 <sup>a</sup> | 90.00              | 89.57             | 90.00              |
|           | (THMA) <sub>2</sub> PbI <sub>4</sub> | 8.53,<br>8.70 <sup>b</sup> | 8.78,<br>8.83 <sup>b</sup> | 89.76              | 90.00             | 90.00              |
|           | (FUMA) <sub>2</sub> PbI <sub>4</sub> | 8.55                       | 8.81                       | 90.07              | 90.00             | 90.00              |
| Bilayer   | (PMA) <sub>2</sub> PbI <sub>4</sub>  | 8.56,<br>8.67 <sup>a</sup> | 9.14,<br>9.14 <sup>a</sup> | 90.00              | 90.00             | 90.00              |
|           | (THMA) <sub>2</sub> PbI <sub>4</sub> | 8.60,<br>8.70 <sup>b</sup> | 8.81,<br>8.83 <sup>b</sup> | 90.00              | 90.00             | 90.00              |
|           | (FUMA) <sub>2</sub> PbI <sub>4</sub> | 8.45                       | 8.82                       | 90.00              | 90.00             | 90.00              |

<sup>a</sup> Data from ref. 1. <sup>b</sup> Data from ref. 2.

**Table S2** Geometrical characteristics of octohedra in relaxed 2D RP phase of Pb-I perovskites ( $n=1$ ) with different spacer molecules of PMA, THMA and FUMA.

|           |                                      | Pb-I-Pb<br>( $^{\circ}$ ) | I-I-I<br>( $^{\circ}$ ) | Thickness<br>( $\text{\AA}$ ) | Pb-I<br>equatorial<br>( $\text{\AA}$ ) | Pb-I<br>vertical<br>( $\text{\AA}$ ) |
|-----------|--------------------------------------|---------------------------|-------------------------|-------------------------------|----------------------------------------|--------------------------------------|
| Monolayer | (PMA) <sub>2</sub> PbI <sub>4</sub>  | 153                       | 116                     | 16.61                         | 3.191                                  | 3.236                                |
|           | (THMA) <sub>2</sub> PbI <sub>4</sub> | 149                       | 121                     | 16.47                         | 3.177                                  | 3.245                                |
|           | (FUMA) <sub>2</sub> PbI <sub>4</sub> | 149                       | 121                     | 15.34                         | 3.184                                  | 3.231                                |
| Bilayer   | (PMA) <sub>2</sub> PbI <sub>4</sub>  | 155                       | 114                     | 30.90                         | 3.208                                  | 3.236                                |
|           | (THMA) <sub>2</sub> PbI <sub>4</sub> | 150                       | 120                     | 31.06                         | 3.183                                  | 3.251                                |
|           | (FUMA) <sub>2</sub> PbI <sub>4</sub> | 148                       | 122                     | 29.79                         | 3.179                                  | 3.245                                |

**Table S3** Structural parameters quantifying internal distortions in relaxed 2D RP phase of Pb-I perovskites ( $n=1$ ) with different spacer molecules of PMA, THMA and FUMA.

|           |                                      | Average<br>octahedral<br>angle<br>variance<br>$(\sigma_{oct}^2)$ | Average<br>octahedron<br>distortion<br>parameter<br>$(\Delta)$ | Average<br>quadratic<br>elongation<br>$(\langle\lambda\rangle)$ |
|-----------|--------------------------------------|------------------------------------------------------------------|----------------------------------------------------------------|-----------------------------------------------------------------|
| Monolayer | (PMA) <sub>2</sub> PbI <sub>4</sub>  | 13.25                                                            | 4.65E-05                                                       | 1.00005                                                         |
|           | (THMA) <sub>2</sub> PbI <sub>4</sub> | 5.59                                                             | 9.97E-05                                                       | 1.00010                                                         |
|           | (FUMA) <sub>2</sub> PbI <sub>4</sub> | 5.84                                                             | 4.92E-05                                                       | 1.00005                                                         |
| Bilayer   | (PMA) <sub>2</sub> PbI <sub>4</sub>  | 14.46                                                            | 1.18E-05                                                       | 1.00001                                                         |
|           | (THMA) <sub>2</sub> PbI <sub>4</sub> | 7.14                                                             | 7.95E-05                                                       | 1.00008                                                         |
|           | (FUMA) <sub>2</sub> PbI <sub>4</sub> | 5.88                                                             | 7.97E-05                                                       | 1.00008                                                         |

## Reference

1. M.-H. Tremblay, J. Bacsá, B. Zhao, F. Pulvirenti, S. Barlow and S. R. Marder, *Chem. Mater.*, 2019, 31, 6145-6153.
2. C. Ni, Y. Huang, T. Zeng, D. Chen, H. Chen, M. Wei, A. Johnston, A. H. Proppe, Z. Ning, E. H. Sargent, P. Hu and Z. Yang, *Angew Chem Int Ed Engl*, 2020, 59, 13977-13983.
